# Supplementary material for: Evidence of Differences in Cellular Regulation of Wolbachia-Mediated Viral Inhibition between Alphaviruses and Flaviviruses
Source: MDPI journal article supplement (doi:10.3390/v16010115), 2024-01-13
Supplement: s1 [file s1]

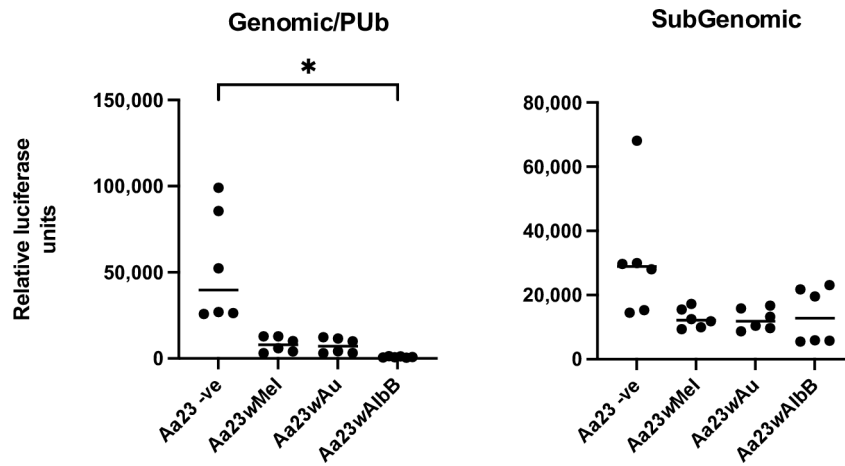

**Supplementary Figure S1. Expression of markers encoded in the viral template in the absence of viral replicase.** Cells were transfected with two plasmids, one containing the viral template where *FFLuc* activity is under the control of the *Aedes* PUB promoter and SFV genomic promoter and *Gluc* is under the control of the SFV subgenomic promoter (template) and one empty plasmid as a control. Each graph shows 3 independent experiments carried out in duplicate. Y axis represents relative light units/55,000 cells. Statistical significance was determined via an ordinary one-way ANOVA.
